# Supplementary material for: “Closer‐to‐home” strategy benefits juvenile survival in a long‐distance migratory bird
Source: PubMed Central journal article supplement (PMC6706183; doi:10.1002/ece3.5395), 2019-07-23
Supplement: ECE3-9-8945-s001.pdf [file ECE3-9-8945-s001.pdf]

## Appendix S1 Tagging details and initial full models

### “Closer-to-home” strategy benefits juvenile survival in a long-distance migratory bird

Yachang Cheng, Wolfgang Fiedler, Martin Wikelski, Andrea Flack

**Table S1** Sample sizes of the different stork tagging location

| Region (reference location)                  | 2013 | 2014 | 2015 | 2016 | 2017 |
|----------------------------------------------|------|------|------|------|------|
| Bavaria (49.84° N, 10.82° E), Germany        | 0    | 6    | 10   | 2    | 0    |
| Oberschwaben (48.01° N, 9.02° E), Germany    | 0    | 9    | 7    | 0    | 0    |
| Rheinland-Pfalz (49.22° N, 8.17° E), Germany | 0    | 0    | 21   | 23   | 12   |
| Southwest Germany (47.75° N, 8.93° E)        | 12   | 57   | 2    | 2    | 3    |
| Vorarlberg (47.39° N, 9.70° E), Austria      | 0    | 0    | 0    | 3    | 0    |
| Total                                        | 12   | 72   | 40   | 30   | 15   |

**Table S2** Initial full model of Cox proportion hazard for post-fledging, migration and wintering stage.

| Stage         | Covariates           |                                                                           | Total df. |
|---------------|----------------------|---------------------------------------------------------------------------|-----------|
| Post-fledging | Individual condition | sex, hatch rank, sibling number, fledging date                            | 10        |
|               | Movement             | log median daily post-fledging distance, median daily post-fledging ODBA* |           |
| Migration     | Individual condition | sex, hatch rank, sibling number, fledging date                            | 15        |

|           |                      |                                                                                                                                              |    |
|-----------|----------------------|----------------------------------------------------------------------------------------------------------------------------------------------|----|
|           | Movement             | departure date, log median daily migration distances, median daily migration ODBA                                                            |    |
|           | Carry over           | log median daily post-fledging distances, median daily post-fledging ODBA                                                                    |    |
| Wintering | Individual condition | sex, hatch rank, sibling number, fledging date                                                                                               | 19 |
|           | Movement             | departure date, log median wintering distances, median daily wintering ODBA, wintering regions                                               |    |
|           | Carry over           | log median daily post-fledging distances, log median daily migration distances, median daily post-fledging ODBA, median daily migration ODBA |    |

\* ODBA: Overall Dynamic Body Acceleration
